## Erratum

# Isolation of Natural Fungal Pathogens from *Marchantia polymorpha* Reveals Antagonism between Salicylic Acid and Jasmonate during Liverwort–Fungus Interactions

Hidenori Matsui, Hidekazu Iwakawa, Gang-Su Hyon, Izumi Yotsui, Shinpei Katou, Isabel Monte, Ryuichi Nishihama, Rainer Franzen, Roberto Solano and Hirofumi Nakagami

*Plant and Cell Physiology*, <https://doi.org/10.1093/pcp/pcz187>

The first version of this paper mislabelled the authors' equal contributions to the article. This has now been corrected online. The publisher apologizes for the error.
